# Supplementary material
Source: PubMed Central journal article supplement (PMC7805325)

## Supplementary Figure 1. Identification of M2a, M2b and M2c Subsets Within Mature cSP4 and SP8 Thymocytes

(A) Flow cytometric analysis of the frequency of TCR $\beta^{\text{hi}}$  SP8 in *+/plt* (n=16) controls and *plt/plt* mice (n=16). (B) Flow cytometric analysis showing gating strategy for the detection of M2a, M2b and M2c subsets of mature CD69 $^{\text{+}}$ CD62L $^{\text{+}}$  cSP4 (A) and SP8 (B) in *+/plt* (n=16) controls and *plt/plt* mice (n=16). Flow cytometry data representative of at least 3 independent experiments. In all cases, error bars represent mean  $\pm$  SEM; \*\*\*\*p<0.0001

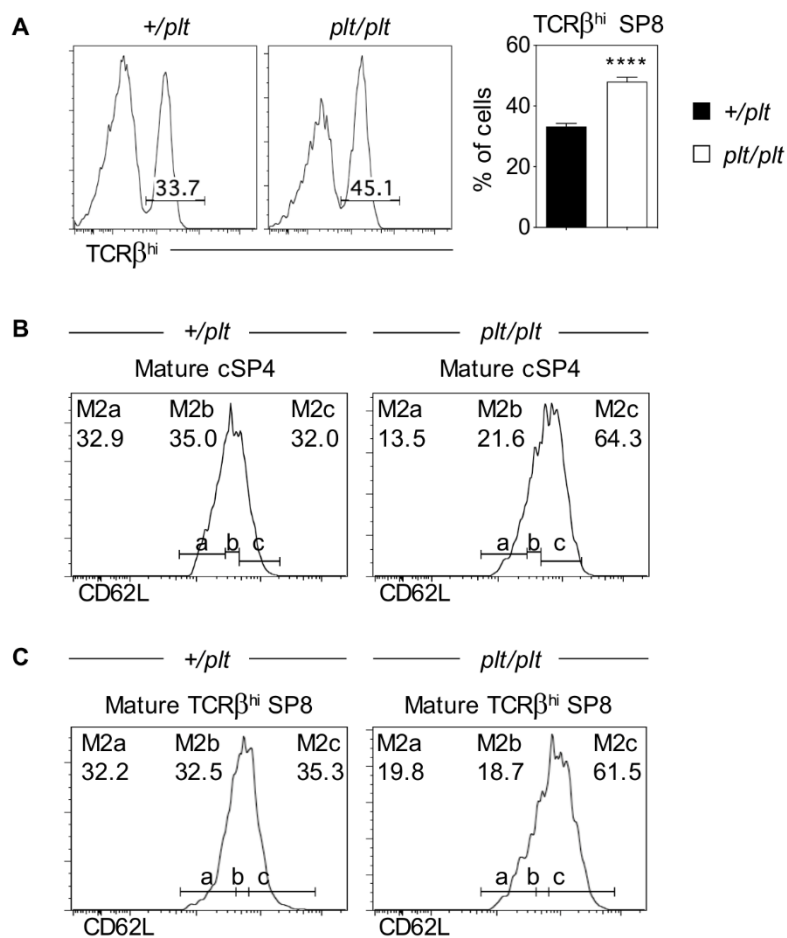

## Supplementary Figure 2. CCL19 Is Dispensable For Neonatal SP Thymocyte Egress

Panel (A) show flow cytometry and quantitation of CD4/CD8 thymocyte subsets in P10 *Ccl19*<sup>-/-</sup> (white bars) and *Ccl19*<sup>+/-</sup> (black bars) littermate controls. Quantitation of immature CD69<sup>+</sup>CD62L<sup>-</sup> and mature CD69<sup>-</sup>CD62L<sup>+</sup> cSP4 (panel B) and TCRβ<sup>hi</sup> SP8 (panel C) thymocytes, in *Ccl19*<sup>-/-</sup> (n=7, black bars) and *Ccl19*<sup>+/-</sup> (n=10, white bars) littermate P10 neonatal mice. (D) shows frequencies of M2a, M2b and M2c subsets of mature CD69<sup>-</sup>CD62L<sup>+</sup> cSP4 and SP8 in *Ccl19*<sup>+/-</sup> (n=7, black bars) controls and *Ccl19*<sup>-/-</sup> mice (n=10, white bars). Error bars represent mean +/- SEM. For analysis of data in D, multiple comparison analysis was achieved by a Two-way ANOVA followed by Sidak's post-test in GraphPad Prism to determine statistical differences. Flow cytometry data representative of at least 2 independent experiments.

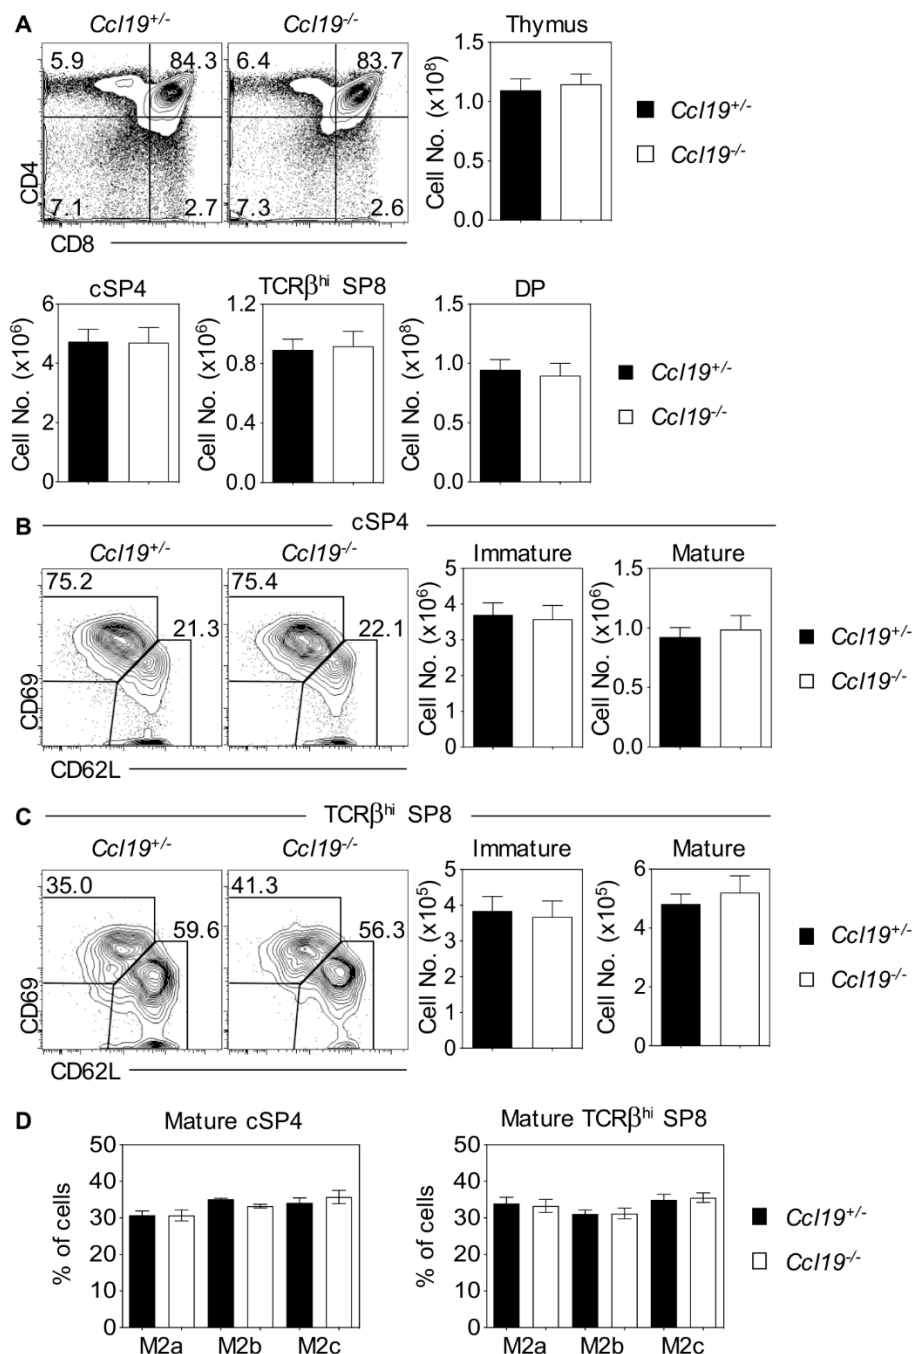

### Supplementary Figure 3. CCL21-Deficient Thymic Grafts Contain Conventional SP Thymocyte Populations

Panel (A) shows flow cytometric analysis of CD4, CD8 expression in *Ccl21a*<sup>+/-</sup> or *Ccl21a*<sup>-/-</sup> grafted thymus lobes, harvested 7 days after surgery. Also shown are numbers of total thymocytes, CD4<sup>+</sup>CD8<sup>+</sup> thymocytes, and cSP4 and SP8TCRβ<sup>hi</sup> thymocytes in *Ccl21a*<sup>+/-</sup> (black bars) or *Ccl21a*<sup>-/-</sup> (white bars). Error bars represent mean +/- SEM, with a minimum of n=3 for each strain.

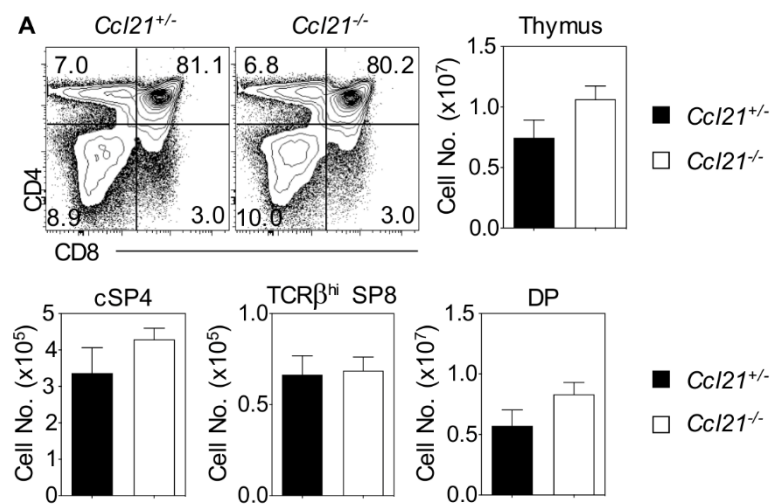

Supplement: advancesADV2020003192-suppl1.pdf [file advancesADV2020003192-suppl1.pdf]
